# Supplementary material for: Establishment of a Virus-Induced Gene-Silencing (VIGS) System in Tea Plant and Its Use in the Functional Analysis of CsTCS1
Source: MDPI journal article supplement (doi:10.3390/ijms24010392), 2022-12-26
Supplement: s1 [file s1]

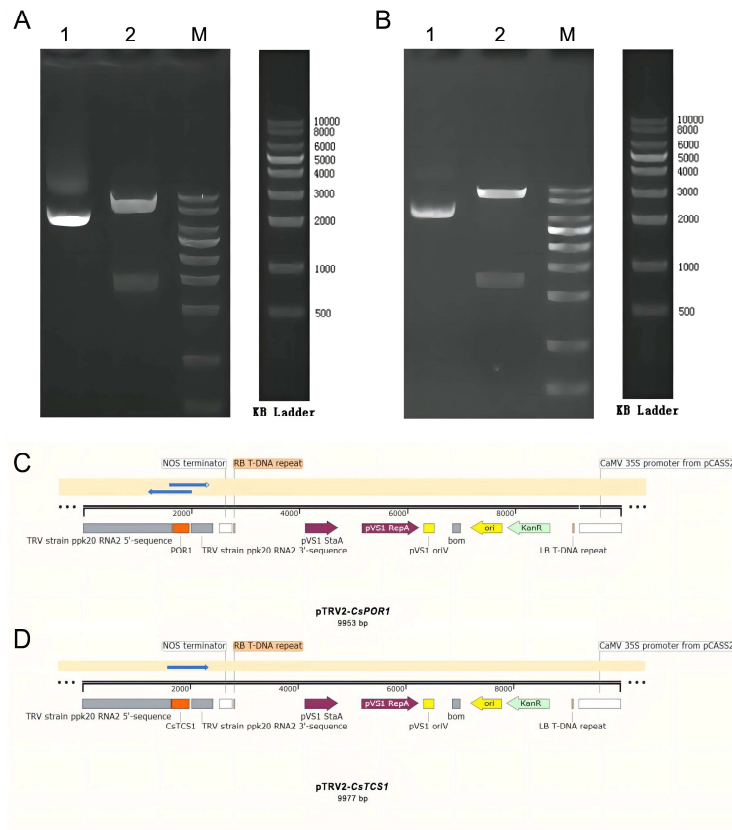

Figure S3. Comparison of tea plants before and after infection with pTRV1 + pTRV2-CsPORA1 *Agrobacterium*. (A,B) Image of tea plants before the pTRV1 + pTRV2-CsPORA1 *Agrobacterium* infection. (C,D) Image of tea plants after the pTRV1 + pTRV2-CsPORA1 *Agrobacterium* infection.

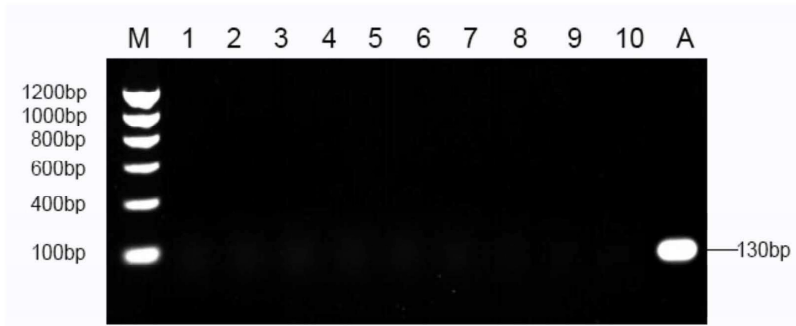

Figure S4. Detection of *Agrobacterium* contamination. 1, uninfected seedlings; 6, uninfected cuttings; 2 and 7, seedlings infected with pTRV1 + pTRV2; 3 and 8, cuttings infected with pTRV1 + pTRV2; 4, seedlings infected with pTRV1 + pTRV2-CsPORA1; 5, cuttings infected with pTRV1 + pTRV2-CsPORA1; 9, seedlings infected with pTRV1 + pTRV2-CsTCS1; 10, cuttings infected with pTRV1 + pTRV2-CsTCS1. A, positive control. M: DL1200 marker.
